# Supplementary material
Source: PubMed Central journal article supplement (PMC6558662)
Supplement: NIHMS1525284-supplement-Supplementary_Figures_and_Tables.pdf [file NIHMS1525284-supplement-Supplementary_Figures_and_Tables.pdf]

# Supplementary Fig. 1

## MSK-HN1 Skull base tumor

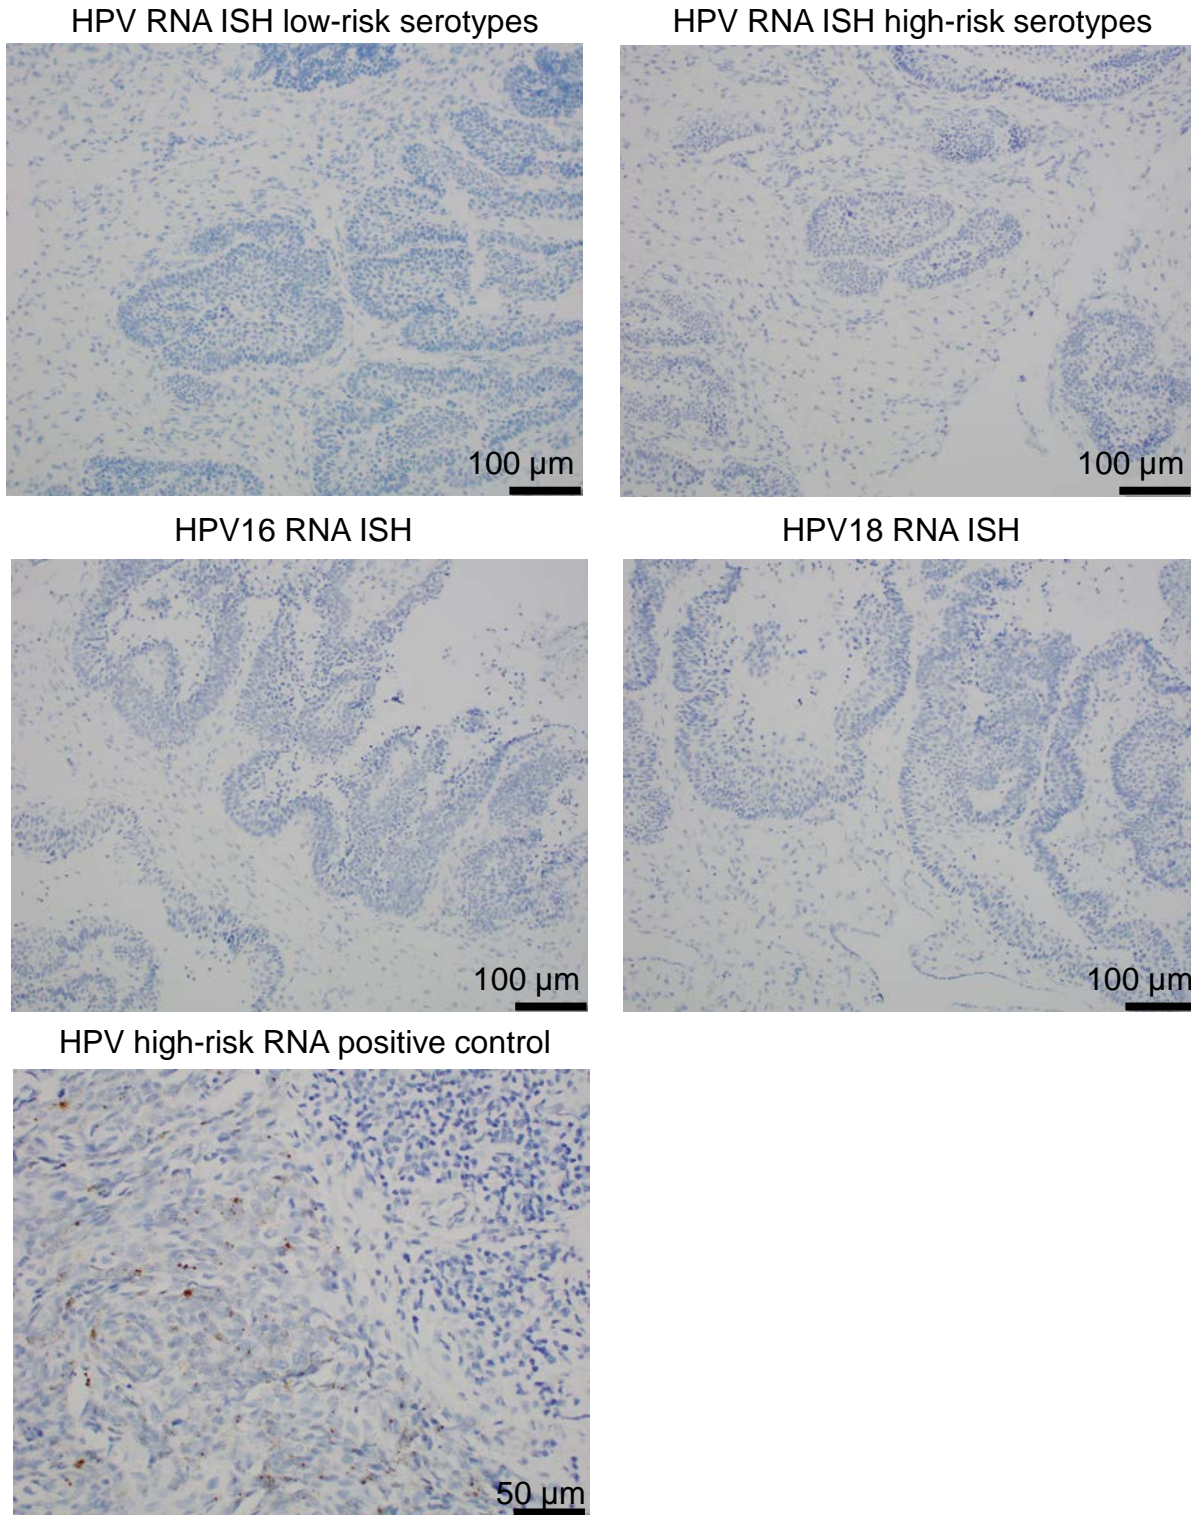

HPV low-risk strains: 6, 11, 40, 43, 44, 54, 69, 70, 71, 74

HPV high-risk strains: 16, 18, 26, 31, 33, 35, 39, 45, 51, 52, 53, 56, 58, 59, 66, 68, 73, 82

**Supplementary Fig. 1** – RNA *in situ* hybridization (ISH) for human papilloma virus (HPV). RNA *in situ* hybridization (ISH) for human papilloma virus (HPV) low-risk and high-risk serotypes, as well as HPV16 and HPV18 strains, indicates that the skull base tumor from Patient MSK-HN1 was not associated with HPV. RNA ISH was performed once with appropriate controls in a Clinical Laboratory Improvement Amendments certified clinical laboratory.



# Supplementary Fig. 2

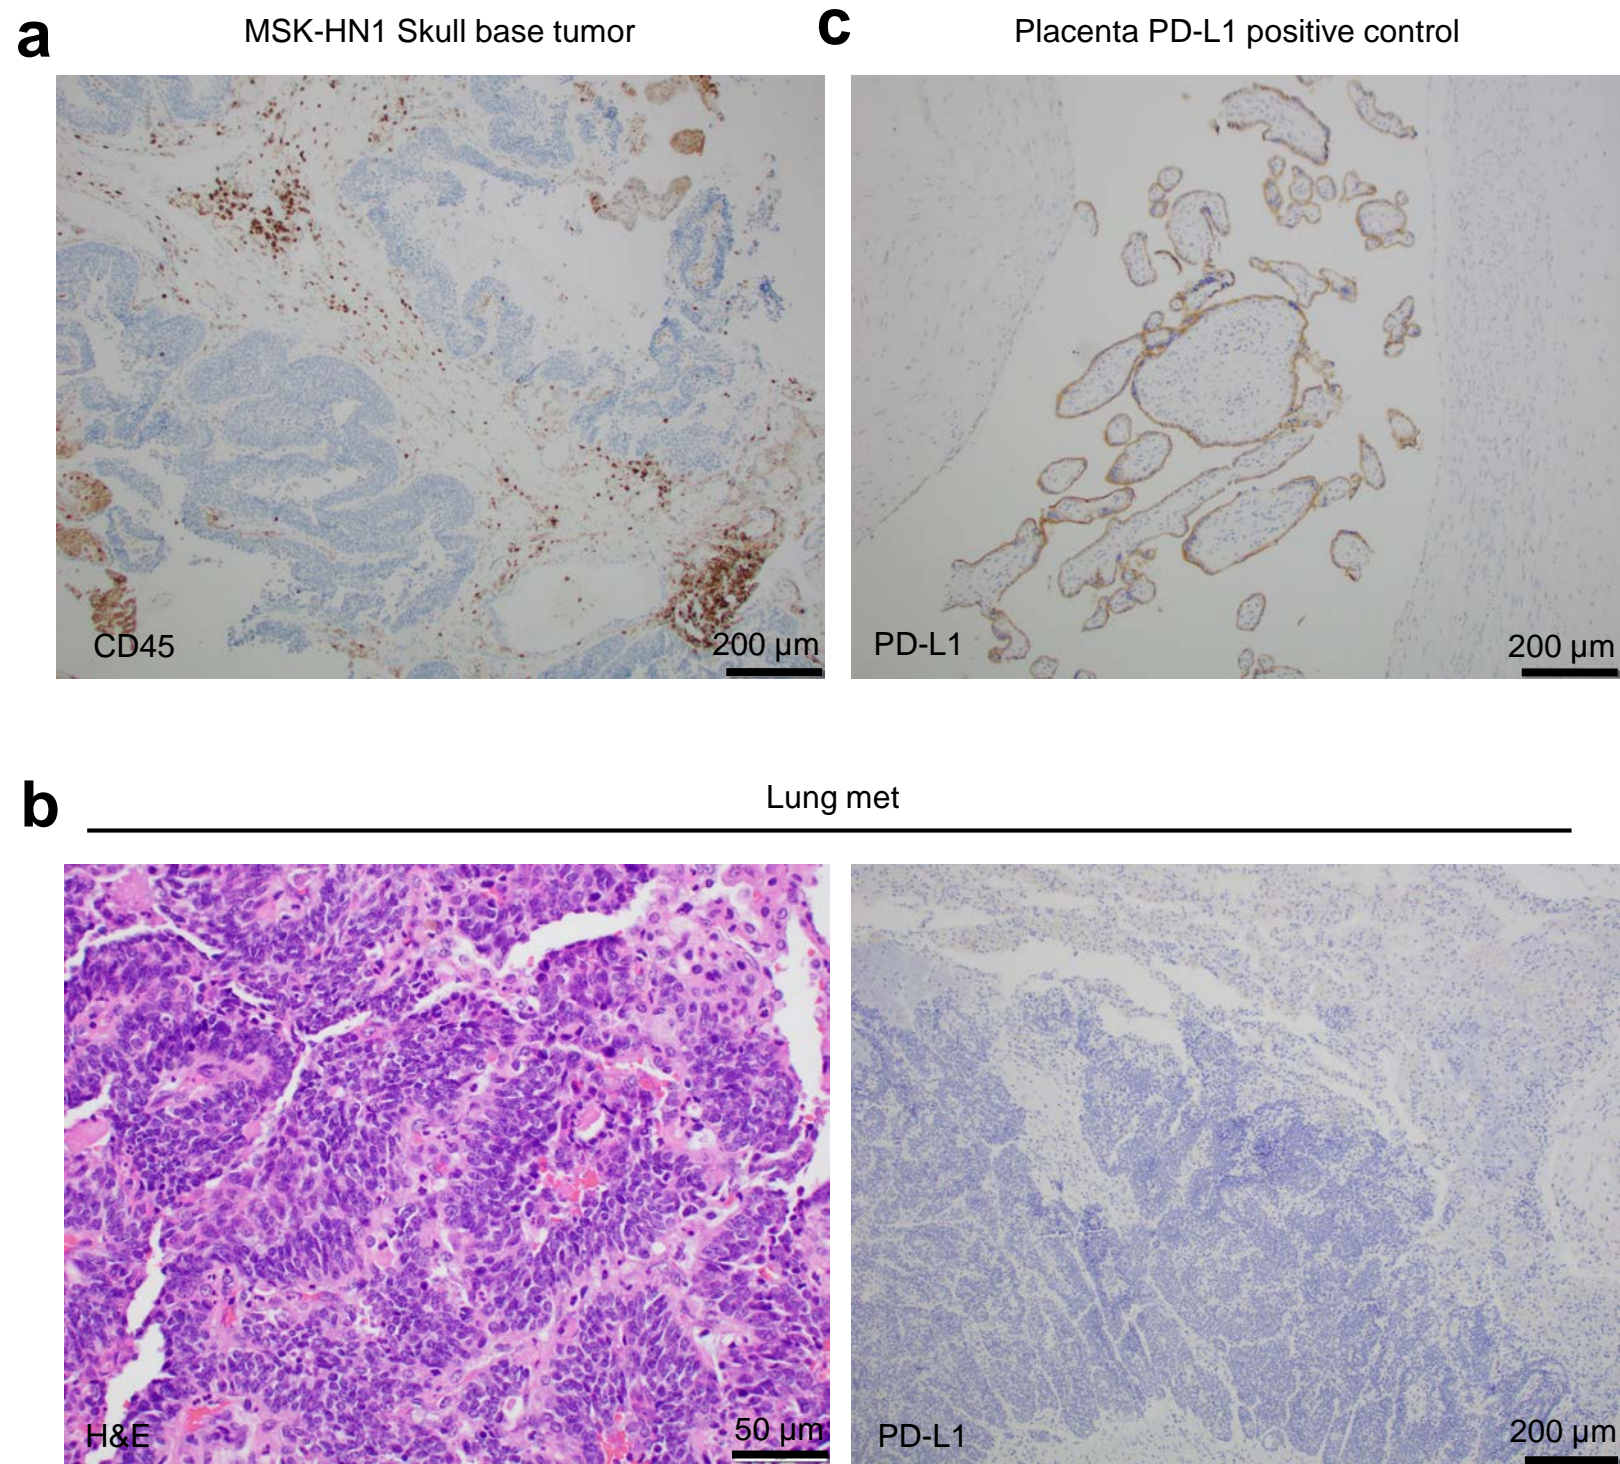

**Supplementary Fig. 2** – Immunohistochemistry staining of Patient MSK-HN1 samples. **a.** Immunohistochemistry staining for CD45 in the primary skull base tumor of Patient MSK-HN1 revealed a modest level of immune infiltration prior to any treatment. **b.** An additional tissue section of lung metastasis demonstrated no PD-L1 staining, with **c.** PD-L1 positive control. IHC staining was performed at least twice with appropriate controls in a Clinical Laboratory Improvement Amendments certified clinical laboratory.

# Supplementary Fig. 3

## MSK-HN1 Skull base tumor Copy Number Alterations

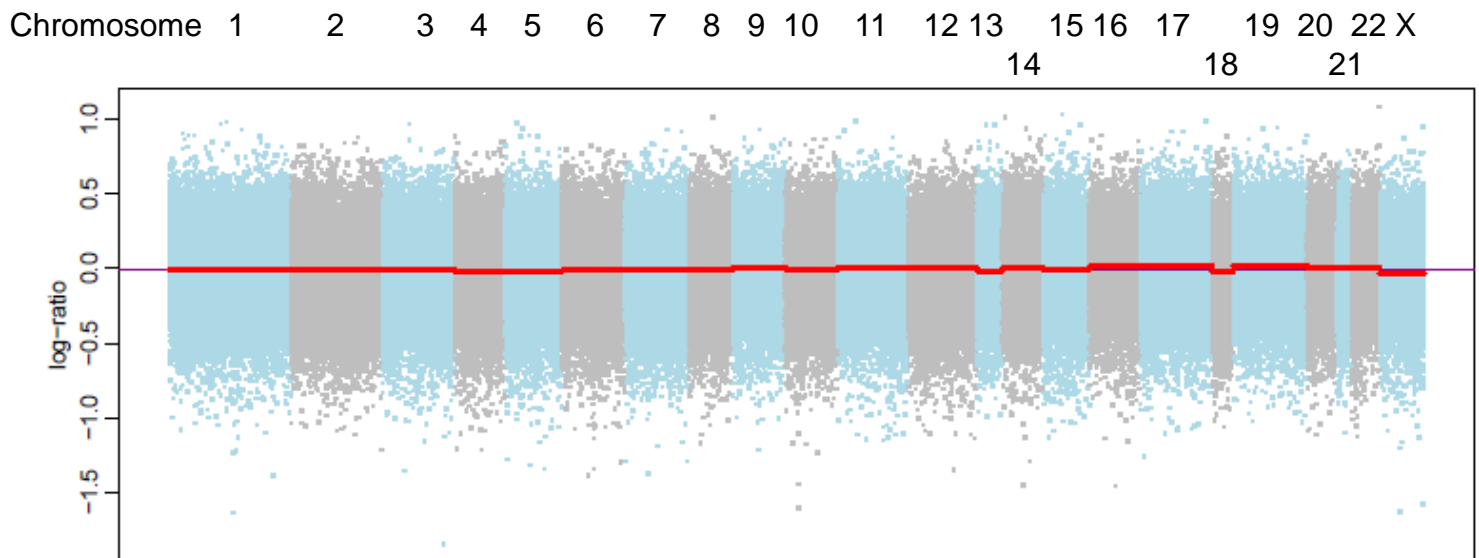

**Supplementary Fig. 3** – FACETS analysis of Patient MSK-HN1’s skull base tumor reveals no significant copy number variations. The red line is the segmentation line showing copy number by chromosomal region, and the y-axis represents log copy number ratio, where 0 represents the diploid genome.

# Supplementary Fig. 4

## TCGA HNSCC Immune Characteristics Scores

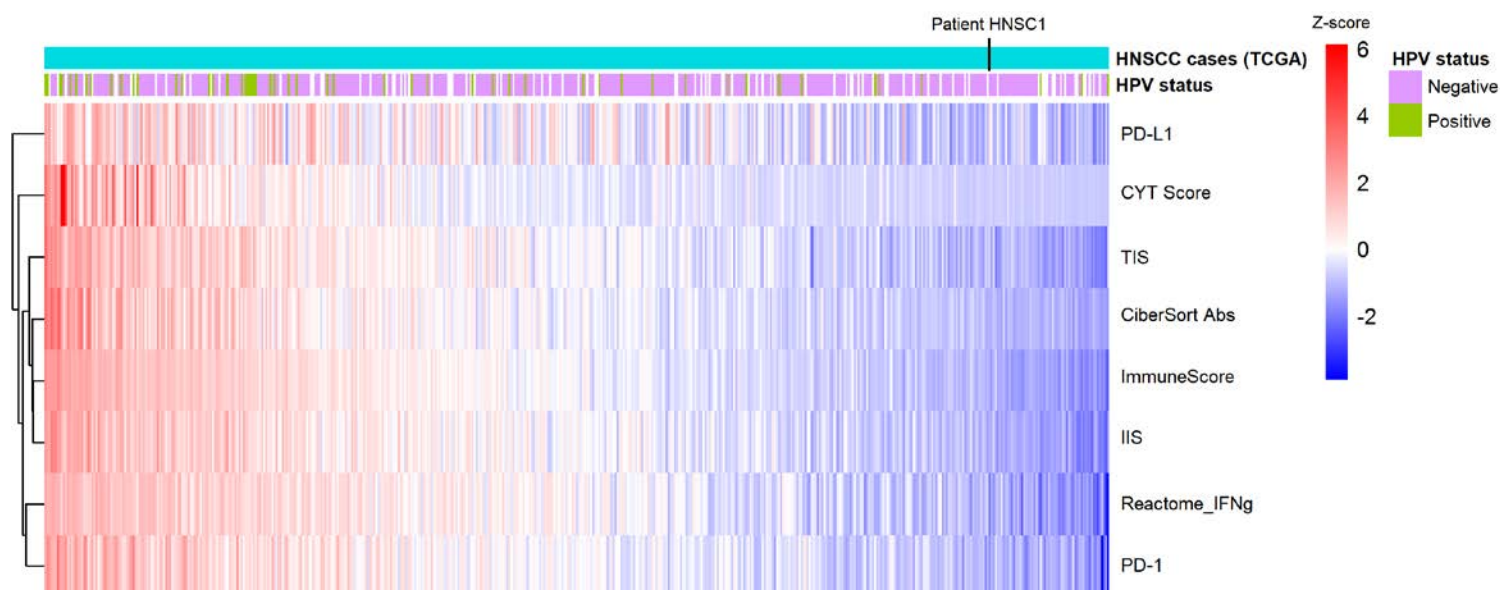

**Supplementary Fig. 4** – Comparison of Patient MSK-HN1’s skull base tumor’s immune characteristics and tumors in the TCGA HNSCC dataset. The MSK-HN1 tumor is relatively lowly immune infiltrated compared to other HNSCC tumors, as measured by Immune Infiltration Score (IIS), T cell Infiltration Score (TIS), ESTIMATE ImmuneScore, CiberSort Absolute Score, CYT Score, and interferon- $\gamma$  signaling ([Reactome.org](https://www.reactome.org/)). The MSK-HN1 tumor had very low PD-L1 and PD-1 expression, consistent with **Fig. 1d**.

# Supplementary Fig. 5

ACC\_M9 Primary tumor  
H&E staining

10X

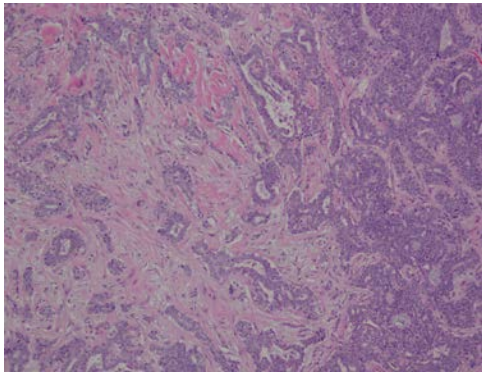

40X

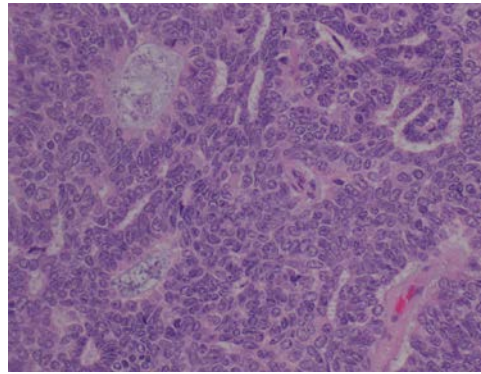

**Supplementary Fig. 5** – H&E staining of formalin-fixed paraffin-embedded (FFPE) slides from Patient ACC\_M9 tumor acquired prior to treatment. The adenoid cystic carcinoma histology was confirmed (by N.K.). Staining was performed once as part of clinical care in a Clinical Laboratory Improvement Amendments certified clinical laboratory.



## Supplementary Fig. 6

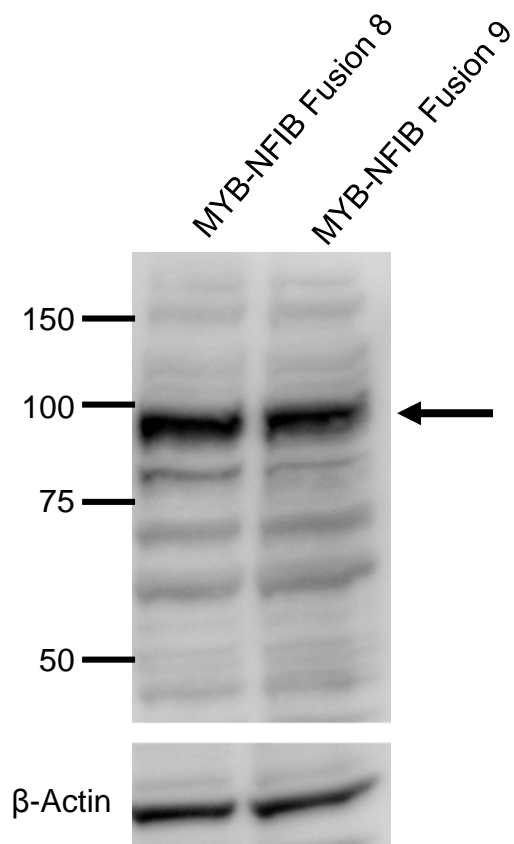

**Supplementary Fig. 6** – Immunoblot confirming the expression of MYB-NFIB fusion constructs. HEK293 cells were transfected with pcRNA6SL-MYB-NFIB fusion plasmids and cell lysates were collected after 48 hr. The lysates were blotted and probed with anti-MYB antibody. Data are representative of two independent experiments.

# Supplementary Fig. 7

Lymphocyte Infiltration Signature Score ( $p = 0.03$ )  
Adjusted for cancer type and TMB

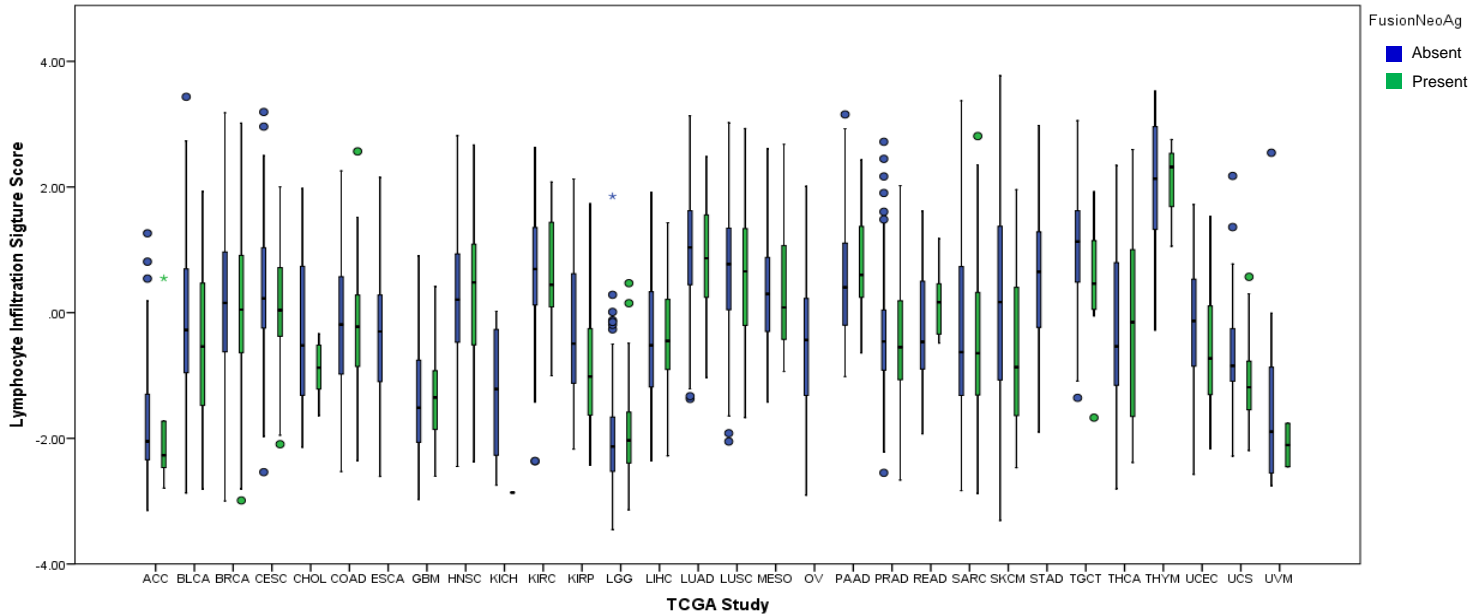

**Supplementary Fig. 7** – Solid tumors with gene fusion products that are predicted to bind patient-specific HLAs (“Fusion NeoAg” present) have lower leukocyte fraction and lymphocyte infiltration signature than solid tumors with a fusion gene present but without a predicted neoantigen that binds HLA (“Fusion NeoAg” = absent). Multi-variate linear regression analysis was performed on 5,825 samples across 30 cancer types from TCGA data adjusting for cancer type and mutational load. The boxes represent the median and interquartile range, the whiskers represent 1.5x the interquartile range, and dots indicate values beyond 1.5 IQR.

# Supplementary Fig. 8

**a**

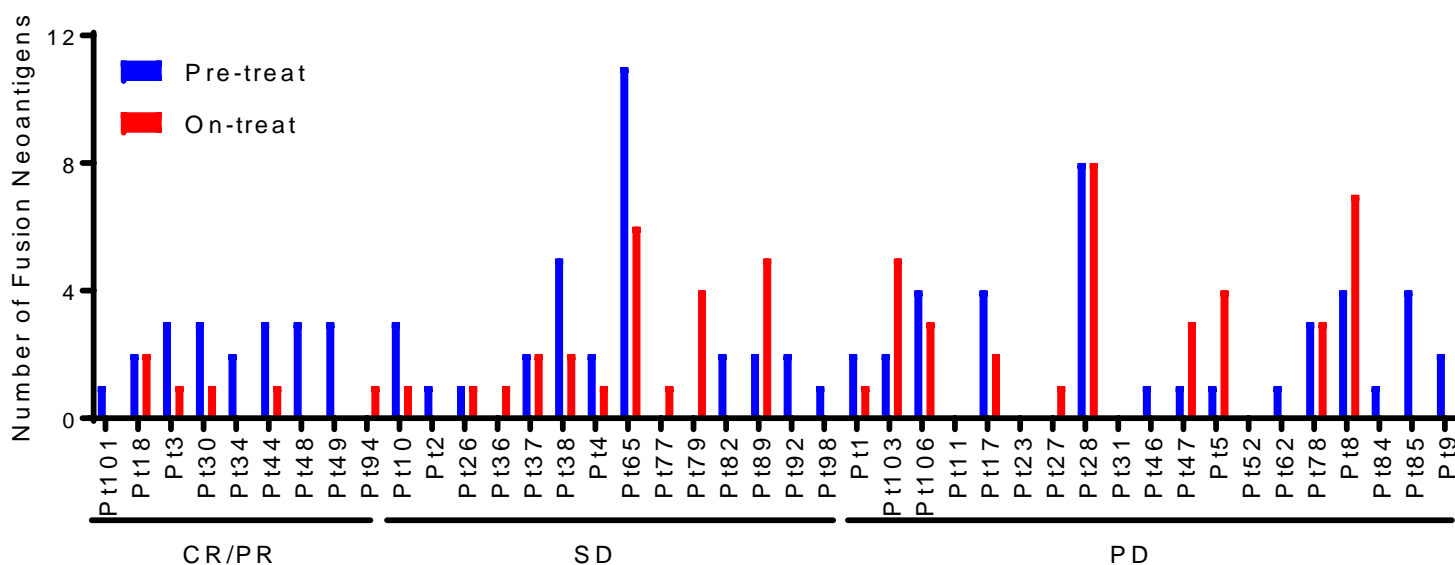

**b**

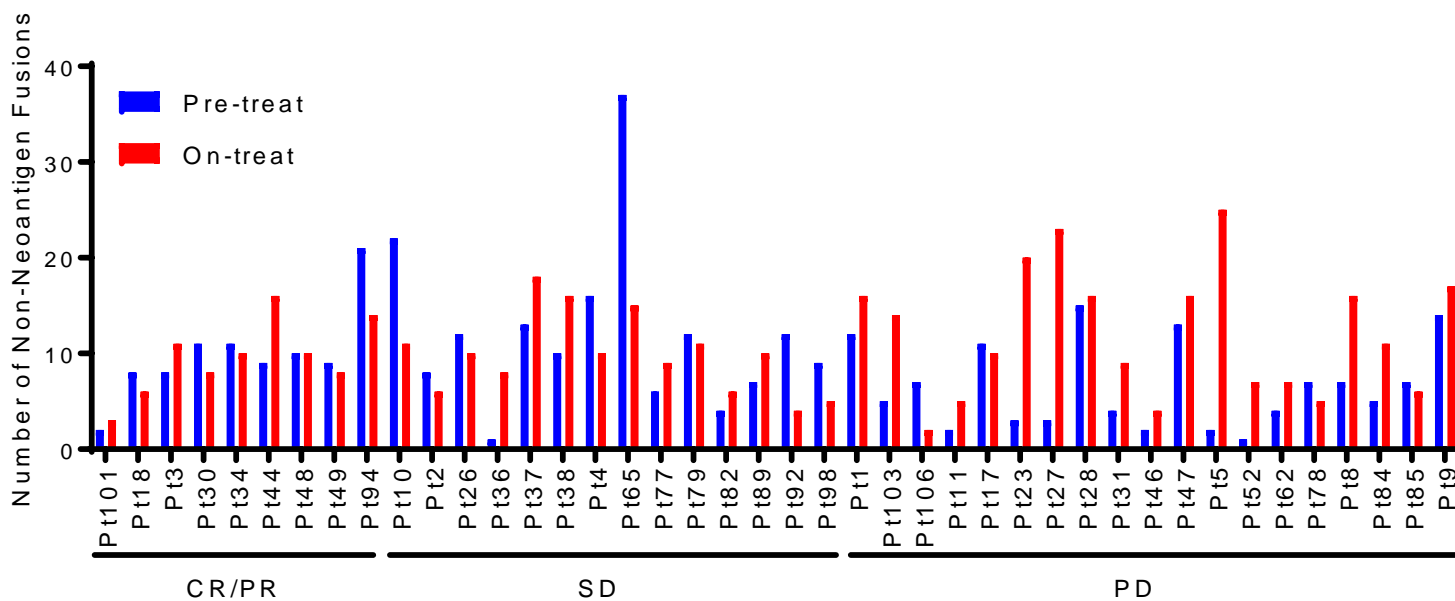

**Supplementary Fig. 8 – a.** Change in fusion neoantigens detected in melanomas treated with anti-PD-1 therapy from pre-therapy and on-therapy timepoints. **b.** Change in non-neoantigen fusions detected in melanomas treated with anti-PD-1 therapy from pre-therapy and on-therapy timepoints.



Supplementary Table 1 - Genetic alterations in Patient HNSC1. The gene fusion DEK-AFF2 and the reciprocal fusion AFF2-DEK are shown with the chromosomal coordinates of the breakpoints. SNVs (missense mutations) are also shown with their respective chromosomal coordinates.

**Fusions**

|          | <b>Breakpoint 1</b> | <b>Breakpoint 2</b> |
|----------|---------------------|---------------------|
| DEK-AFF2 | Chr 6: 18249882     | Chr X: 147891400    |
| AFF2-DEK | Chr X: 147744289    | Chr 6: 18237747     |

**SNV (missense mutations)**

| Gene                           | Nucleotide change | Amino Acid Change | Entrez Gene ID | Transcript ID  | Chromosome | Start Position | Most common nonsilent mutation reported in COSMIC                                                |
|--------------------------------|-------------------|-------------------|----------------|----------------|------------|----------------|--------------------------------------------------------------------------------------------------|
| SUV39H2                        | c.574T>G          | p.S192A           | 79723          | NM_001193424.1 | 10         | 14939241       | R213fs*2 (9 cases, all occurred in clear cell renal cell carcinoma)                              |
| MTUS2                          | c.895G>C          | p.A299P           | 23281          | NM_001033602.2 | 13         | 29599700       | E193K (3 cases in prostate adenocarcinoma, 1 in stomach adenocarcinoma)                          |
| PCSK6                          | c.998G>A          | p.R333Q           | 5046           | NM_002570.4    | 15         | 101933625      | A302V (3 cases); R71Q (3 cases)                                                                  |
| COX5A                          | c.163C>T          | p.R55C            | 9377           | NM_004255.3    | 15         | 75221511       | D81N (3 cases)                                                                                   |
| NP1PB5                         | c.1991G>C         | p.R664P           | 440345         | NM_001135865.1 | 16         | 22546295       | P485-A488delPPSA (10 cases, 3 of which are in HNSCC); F616C (5 cases in hematopoietic neoplasms) |
| LIG1                           | c.1493A>T         | p.E498V           | 3978           | NM_000234.2    | 19         | 48638967       | D570E (4 cases in serous carcinoma)                                                              |
| ZNF460                         | c.1067G>A         | p.R356Q           | 10794          | NM_006635.3    | 19         | 57802976       | EL27K (4 cases)                                                                                  |
| OR7D4                          | c.350T>C          | p.V117A           | 125958         | NM_001005191.2 | 19         | 9325164        | V49I (6 cases)                                                                                   |
| STAU1                          | c.345G>C          | p.R115S           | 6780           | NM_001322932.1 | 20         | 47768284       | L181V (5 cases)                                                                                  |
| OTOP1                          | c.1793G>C         | p.R598P           | 133060         | NM_177998.1    | 4          | 4190576        | L104_W106delLLW (38 cases, recurrent in HNSCC); L226fs*1 (6 cases, 5 in thyroid cancer)          |
| OTOP1                          | c.1792C>G         | p.R598G           | 133060         | NM_177998.1    | 4          | 4190577        |                                                                                                  |
| OTOP1                          | c.1774C>G         | p.P592A           | 133060         | NM_177998.1    | 4          | 4190595        |                                                                                                  |
| DSPP                           | c.2017G>A         | p.D673N           | 1834           | NM_014208.3    | 4          | 88535831       | Several inframe indels; D673N (6 cases)                                                          |
| COL14A1                        | c.890C>T          | p.A297V           | 7373           | NM_021110.3    | 8          | 121215960      | R566Q (10 cases, none of which are in HNSCC); L793I (5 cases); T636M (5 cases)                   |
| <b>Non-protein coding SNVs</b> |                   |                   |                |                |            |                |                                                                                                  |
| GPRC5B                         | c.265C>T          | None              | 51704          | NM_001304771.1 | 16         | 19896652       |                                                                                                  |
| DCLK2                          | c.961+2T>C        | None              | 166614         | NM_001040261.4 | 4          | 151119257      |                                                                                                  |

Supplementary Table 2 - SNV-derived peptides predicted to bind Patient HNSCL HLAs. All possible 9-amino acid length peptide combinations that were predicted to bind significantly to patient-specific HLAs are shown (NetMHCpan 4.0, Rank <2%) (left). Since one neoantigen peptide can be predicted to bind to multiple HLAs, we generated a list of unique peptides (right). The mutated amino acid is indicated by a capital letter.

| Gene    | WT Peptide | MUT Peptide | HLA binder | WT Rank (%) | MUT Rank (%) | Unique Peptides   |
|---------|------------|-------------|------------|-------------|--------------|-------------------|
| COL14A1 | lfaigvknA  | lfaigvknV   | C0401      | 7.5371      | 1.7933       | COL14A1 lfaigvknV |
| COL14A1 | vknAdvnel  | vknVdvnel   | B3801      | 0.8639      | 1.0801       | COL14A1 vknVdvnel |
| COL14A1 | faigvknAd  | faigvknVd   | C1203      | 1.2         | 1            | COL14A1 faigvknVd |
| COX5A   | efdaRwvty  | efdaCwvty   | A2601      | 0.6723      | 1.9058       | COX5A efdaCwvty   |
| COX5A   | efdaRwvty  | efdaCwvty   | C0401      | 0.05        | 0.015        | COX5A fdaCwvtyf   |
| COX5A   | efdaRwvty  | efdaCwvty   | B3501      | 2.5         | 1.2          | LIG1 ktwleVqgm    |
| COX5A   | fdaRwvtyf  | fdaCwvtyf   | A2601      | 1.3         | 1.3          | LIG1 twleVqgmi    |
| COX5A   | fdaRwvtyf  | fdaCwvtyf   | C1203      | 0.7         | 0.6          | LIG1 wleVqgmil    |
| COX5A   | fdaRwvtyf  | fdaCwvtyf   | B3501      | 2.5         | 1.3          | LIG1 earktwleV    |
| COX5A   | fdaRwvtyf  | fdaCwvtyf   | C0401      | 1.2         | 1.7          | LIG1 eVqgmilKq    |
| LIG1    | ktwleEqgm  | ktwleVqgm   | C1203      | 3.6738      | 1.4143       | MTUS2 Pskipskl    |
| LIG1    | twleEqgmi  | twleVqgmi   | C0401      | 1.8116      | 1.3717       | MUC4 lPvtspssa    |
| LIG1    | wleEqgmil  | wleVqgmil   | C0401      | 0.2746      | 0.8927       | MUC4 tPlPvtspss   |
| LIG1    | earktwleE  | earktwleV   | A2601      | 7           | 2            | NPIP5 ePmiisrhl   |
| LIG1    | earktwleE  | earktwleV   | C1203      | 13          | 1.6          | NPIP5 grfhpePmi   |
| LIG1    | eEqgmilKq  | eVqgmilKq   | A2601      | 16          | 1.7          | NPIP5 hpePmiisr   |
| LIG1    | twleEqgmi  | twleVqgmi   | C0401      | 1.8         | 1.2          | OR7D4 aAmaydrfv   |
| LIG1    | wleEqgmil  | wleVqgmil   | B3801      | 0.5         | 1.5          | OR7D4 dtfllaAma   |
| LIG1    | wleEqgmil  | wleVqgmil   | C0401      | 0.175       | 0.6          | OR7D4 gmdtflaA    |
| MTUS2   | Askeipskl  | Pskipskl    | C1203      | 1.3         | 1.8          | OR7D4 laAmaydrf   |
| MUC4    | lHvtspssa  | lPvtspssa   | B3501      | 22          | 0.7          | OR7D4 tfllaAmay   |
| MUC4    | tplHvtspss | tpPvtspss   | B3501      | 0.6         | 0.5          | OR7D4 mdtflaAm    |
| MUC4    | tplHvtspss | tpPvtspss   | C0401      | 3.5         | 1.7          | OTOP1 fsifyPmha   |
| NPIP5   | eRmiisrhl  | ePmiisrhl   | B3501      | 10.7657     | 0.7124       | OTOP1 ifyPmhaaa   |
| NPIP5   | grfhpeRmi  | grfhpePmi   | B3801      | 0.8555      | 0.5429       | OTOP1 mpfsifyPm   |
| NPIP5   | hpeRmiisr  | hpePmiisr   | B3501      | 2.9458      | 1.0847       | OTOP1 sifyPmhaa   |
| NPIP5   | rFhpeRmi   | rFhpePmi    | C0401      | 0.443       | 0.1805       | OTOP1 yPmhaaaasl  |
| NPIP5   | rFhpeRmi   | rFhpePmi    | C1203      | 1.8336      | 1.4276       | OTOP1 fsifyGmha   |
| OR7D4   | aVmaydrfv  | aAmaydrfv   | C1203      | 1.7773      | 1.1533       | OTOP1 mpfsifyGm   |
| OR7D4   | dtfllaVma  | dtfllaAma   | A2601      | 2.6329      | 1.9769       | OTOP1 Gmhaaaasl   |
| OR7D4   | gmdtflaV   | gmdtflaA    | A0201      | 0.1103      | 0.4718       | OTOP1 sifyGmhaa   |
| OR7D4   | laVmaydrf  | laAmaydrf   | C1203      | 1.9922      | 1.4779       | OTOP1 yGmhaaaasl  |
| OR7D4   | laVmaydrf  | laAmaydrf   | B3501      | 0.7973      | 0.5256       | OTOP1 ivvnlamAf   |
| OR7D4   | tfllaVmay  | tfllaAmay   | B3501      | 1.8548      | 1.5468       | OTOP1 lamAfsify   |
| OR7D4   | tfllaVmay  | tfllaAmay   | A2601      | 1.3856      | 1.6105       | OTOP1 mAFsifyrm   |
| OR7D4   | aVmaydrfv  | aAmaydrfv   | C1203      | 3.5         | 1.1          | OTOP1 nlamAfsif   |
| OR7D4   | mdtflaVm   | mdtflaAm    | B3501      | 1.7         | 0.9          | PCSK6 gQqglsif    |
| OR7D4   | tfllaVmay  | tfllaAmay   | C0401      | 2.5         | 1.4          | PCSK6 feyqkGr     |
| OTOP1   | fsifyRmha  | fsifyPmha   | C1203      | 2.4647      | 1.0555       | PCSK6 Qrqqglsif   |
| OTOP1   | ifyRmhaaa  | ifyPmhaaa   | C0401      | 6.1722      | 1.3124       | STAU1 gayppSyfy   |
| OTOP1   | mpfsifyRm  | mpfsifyPm   | A2601      | 0.9093      | 1.9852       | STAU1 ggaayppSyf  |
| OTOP1   | mpfsifyRm  | mpfsifyPm   | B3501      | 0.0426      | 0.0954       | STAU1 rggayppSyf  |
| OTOP1   | sifyRmhaa  | sifyPmhaa   | A0201      | 1.4724      | 1.058        | STAU1 yppSyfyf    |
| OTOP1   | sifyRmhaa  | sifyPmhaa   | A2601      | 1.9683      | 1.2785       | ZNF460 shlkqheQi  |
| OTOP1   | sifyRmhaa  | sifyPmhaa   | C1203      | 1.5422      | 1.2836       | ZNF460 QihstgeKpf |
| OTOP1   | yRmhaaaasl | yPmhaaaasl  | A2601      | 5.0155      | 1.6443       |                   |
| OTOP1   | yRmhaaaasl | yPmhaaaasl  | B3501      | 3.99        | 0.0175       |                   |
| OTOP1   | yRmhaaaasl | yPmhaaaasl  | B3801      | 0.03        | 0.9608       |                   |
| OTOP1   | yRmhaaaasl | yPmhaaaasl  | C0401      | 0.6502      | 0.9436       |                   |
| OTOP1   | yRmhaaaasl | yPmhaaaasl  | C1203      | 0.3364      | 0.4647       |                   |
| OTOP1   | fsifyRmha  | fsifyGmha   | C1203      | 2.4647      | 1.7387       |                   |
| OTOP1   | mpfsifyRm  | mpfsifyGm   | C1203      | 1.3206      | 1.6499       |                   |
| OTOP1   | mpfsifyRm  | mpfsifyGm   | B3501      | 0.0426      | 0.0703       |                   |
| OTOP1   | mpfsifyRm  | mpfsifyGm   | A2601      | 0.9093      | 0.8701       |                   |
| OTOP1   | Rmhaaaasl  | Gmhaaaasl   | C0401      | 0.6938      | 1.795        |                   |
| OTOP1   | sifyRmhaa  | sifyGmhaa   | A0201      | 1.4724      | 0.615        |                   |
| OTOP1   | sifyRmhaa  | sifyGmhaa   | A2601      | 1.9683      | 1.3761       |                   |
| OTOP1   | sifyRmhaa  | sifyGmhaa   | C1203      | 1.5422      | 1.1766       |                   |
| OTOP1   | yRmhaaaasl | yGmhaaaasl  | C1203      | 0.3364      | 0.0714       |                   |
| OTOP1   | yRmhaaaasl | yGmhaaaasl  | C0401      | 0.6502      | 1.5099       |                   |
| OTOP1   | yRmhaaaasl | yGmhaaaasl  | B3501      | 3.99        | 1.7778       |                   |
| OTOP1   | ivvnlamPf  | ivvnlamAf   | B3501      | 1.0456      | 0.4401       |                   |
| OTOP1   | ivvnlamPf  | ivvnlamAf   | C1203      | 0.9286      | 0.2542       |                   |
| OTOP1   | ivvnlamPf  | ivvnlamAf   | A2601      | 0.8402      | 0.3307       |                   |
| OTOP1   | lamPfsify  | lamAfsify   | B3501      | 0.0607      | 0.1994       |                   |
| OTOP1   | lamPfsify  | lamAfsify   | A2601      | 0.2469      | 0.6221       |                   |
| OTOP1   | lamPfsify  | lamAfsify   | C1203      | 0.0457      | 0.3645       |                   |
| OTOP1   | mPfsifyrm  | mAFsifyrm   | C1203      | 1.3206      | 0.1679       |                   |
| OTOP1   | mPfsifyrm  | mAFsifyrm   | A2601      | 0.9093      | 0.4634       |                   |
| OTOP1   | mPfsifyrm  | mAFsifyrm   | B3501      | 0.0426      | 0.3217       |                   |
| OTOP1   | nlamPfsif  | nlamAfsif   | A2601      | 0.6079      | 0.8682       |                   |
| PCSK6   | gQqglsif   | gQqglsif    | B3801      | 0.6024      | 0.916        |                   |
| PCSK6   | feyqkGr    | feyqkGr     | C0401      | 2.5         | 2            |                   |
| PCSK6   | Grqqglsif  | Qrqqglsif   | B3801      | 1           | 0.5          |                   |
| STAU1   | gayppRyfy  | gayppSyfy   | C0401      | 1.3205      | 1.0705       |                   |
| STAU1   | gayppRyfy  | gayppSyfy   | A2601      | 0.3473      | 0.2725       |                   |
| STAU1   | gayppRyfy  | gayppSyfy   | B3501      | 0.1777      | 0.0943       |                   |
| STAU1   | gayppRyfy  | gayppSyfy   | C1203      | 0.0386      | 0.0341       |                   |
| STAU1   | ggayppRyf  | ggayppSyf   | C1203      | 1.5962      | 1.4309       |                   |
| STAU1   | rggayppRy  | rggayppSy   | C1203      | 3.4846      | 1.9164       |                   |
| STAU1   | yppRyfyf   | yppSyfyf    | B3501      | 0.3753      | 0.1695       |                   |
| STAU1   | yppRyfyf   | yppSyfyf    | A2601      | 2.71        | 1.6          |                   |
| ZNF460  | shlkqheRi  | shlkqheQi   | B3801      | 0.4039      | 0.2099       |                   |
| ZNF460  | RihstgeKpf | QihstgeKpf  | B3501      | 4           | 2            |                   |
| ZNF460  | shlkqheRi  | shlkqheQi   | B3801      | 0.5         | 0.25         |                   |

HLA-A\*02:01 peptides are highlighted

Supplementary Table 3 - Fusion-derived peptides predicted to bind Patient HNSC1 HLAs. All possible 9-amino acid length peptide combinations surrounding the fusion breakpoints of DEK-AFF2 or AFF2-DEK are listed with the predicted patient-specific HLA binding values (NetMHCpan 4.0).

| Peptide   | Fusion   | HLA-A0201<br>Rank (%) | HLA-A2601<br>Rank (%) | HLA-B3501<br>Rank (%) | HLA-B3801<br>Rank (%) | HLA-C0401<br>Rank (%) | HLA-C1203<br>Rank (%) |
|-----------|----------|-----------------------|-----------------------|-----------------------|-----------------------|-----------------------|-----------------------|
| FTILQTSEP | AFF2-DEK | 28.3913               | 15.7193               | 21.7468               | 44.4444               | 42.1379               | 13.6372               |
| TILQTSEPP | AFF2-DEK | 38.5882               | 61                    | 38.9                  | 68.125                | 70.625                | 61.9048               |
| ILQTSEPPK | AFF2-DEK | 25.5652               | 43.1818               | 42.8571               | 69.375                | 19.8059               | 45.2794               |
| LQTSEPPKK | AFF2-DEK | 33.8519               | 35.2632               | 38.2                  | 35.72                 | 23.329                | 35.9632               |
| QTSEPPKKT | AFF2-DEK | 43.8                  | 19.9918               | 42.7143               | 42.4167               | 48.3158               | 24.8581               |
| TSEPPKKT  | AFF2-DEK | 40.5                  | 36.5294               | 16.8542               | 32.7143               | 12.8303               | 13.8082               |
| SEPPKKTAK | AFF2-DEK | 49.2857               | 14.6642               | 21.3165               | 30.7111               | 14.7184               | 28.6823               |
| EPPKKTAKR | AFF2-DEK | 61.7857               | 10.3687               | 13.388                | 63.5                  | 54.726                | 34.7905               |
| EDKESSEEV | DEK-AFF2 | 47.625                | 23.1791               | 24.549                | 18.6382               | 36.2979               | 57.1721               |
| DKESEEEVS | DEK-AFF2 | 96.6667               | 92.5                  | 69.1667               | 56.6667               | 89.1667               | 92.7778               |
| KESEEEVSL | DEK-AFF2 | 11.0349               | 13.2667               | 4.5523                | 0.7586                | 5.4378                | 13.8115               |
| ESEEEVSLP | DEK-AFF2 | 68                    | 44.6667               | 41.5                  | 64                    | 78.6842               | 73.0769               |
| SEEEVSLPS | DEK-AFF2 | 53.7037               | 40.0769               | 21.519                | 21.4771               | 44.875                | 64.6429               |
| EEEVSLPSD | DEK-AFF2 | 95                    | 85                    | 55.9091               | 49.5                  | 84.6875               | 95.8333               |
| EEVSLPSDP | DEK-AFF2 | 83                    | 71.25                 | 42.7143               | 32.2                  | 84.0625               | 95                    |
| EVSLPSDPS | DEK-AFF2 | 55.5263               | 11.6012               | 17.5443               | 54.375                | 66.7188               | 51.4021               |

Peptide with predicted significant binding is highlighted

Peptide in which Patient MSK-HN1 autologous T cells have reactivity towards

Supplementary Table 4 - Primer sequences for cloning the DEK-AFF2 fusion. The cloning strategy is shown with the appropriate primer pairs.

| Primer name       | Sequence                                        | Comments                                                | Template                                   |
|-------------------|-------------------------------------------------|---------------------------------------------------------|--------------------------------------------|
| <b>DEK-N-term</b> |                                                 |                                                         |                                            |
| DEK-1F            | CACACA-GAATTC-ATGTCCGCCTCGGCCCTGCTGC            | PCR with DEK-1F + DEK-2R, digest with EcoRI and BamHI   | Patient MSK-HN1 cDNA (from FFPE tumor RNA) |
| DEK-2R            | CACACA-GGATCC-CTCCTCTTCACTTTCTTTATCTTCATC       |                                                         |                                            |
| <b>DEK-AFF2</b>   |                                                 |                                                         |                                            |
| DEK-1F            | CACACA-GAATTC-ATGTCCGCCTCGGCCCTGCTGC            | PCR with DEK-1F + DEK-1R, digest with EcoRI and BsmBI   | Patient MSK-HN1 cDNA (from FFPE tumor RNA) |
| DEK-1R            | CACACA-CGTCTCC-TTAC-CTCCTCTTCACTTTCTTTATCTTCATC |                                                         |                                            |
| AFF2-1F           | CACACA-CGTCTCC-GTAAGCCTTCCCAGTGATCCAAG          | PCR with AFF2-1F + AFF2-2R, digest with BsmBI and BamHI | Patient MSK-HN1 cDNA (from FFPE tumor RNA) |
| AFF2-2R           | CACACA-GGATCC-AGTGGCCGTGGACGGGCTTCTC            |                                                         |                                            |



Supplementary Table 5 - TCR $\beta$  clone frequencies in patient tissues pre- and on- treatment.

| GLIPH group name | CDR3s | CRG_Score | Motifs         |
|------------------|-------|-----------|----------------|
| CRG-SSPRGNEQF    | 10    | 2.01E-13  | PRGN(7, 0.001) |

| Peptide   | Frequency              |                     |                  |         |          |
|-----------|------------------------|---------------------|------------------|---------|----------|
|           | IFN $\gamma$ + T cells | Pre-treatment tumor | On-therapy PBMCs |         |          |
|           |                        | Mar-16              | Mar-17           | Jun-17  | Jul-18   |
| SSPRGNEQF | 2.70%                  | 0                   | 0.00326%         | 0.0016% | 0.0000%  |
| SSPRGDEQF | 0.0007%                | 0                   | 0.0000%          | 0.0016% | 0.00178% |

Pre-treatment and on-therapy refer to pembrolizumab treatment

Supplementary Table 7 - Alternative Splicing-derived peptides predicted to bind Patient MSK-HN1 HLAs. Alternative splicing events with high PSI (percentage spliced inclusion; indicating the percentage of transcripts with the event) of 10% or greater are shown. The 9-amino acid length peptide combinations of these alternative splicing events that were predicted to bind significantly to patient-specific HLAs are shown (NetMHCpan 4.0, Rank <2%).

| Gene                 | PSI.median | PSI.mean    | PSI.sum   |
|----------------------|------------|-------------|-----------|
| MROH2A               | 0.4689655  | 0.408817635 | 0.0535433 |
| OBSCN                | 0.2368421  | 0.233711048 | 0.0027372 |
| MROH2A               | 0.2222222  | 0.182825485 | 0.0173228 |
| ICA1L                | 0.2195122  | 0.225402504 | 0.020362  |
| OC90                 | 0.2028986  | 0.175438596 | 0.0200573 |
| EPHB6                | 0.1612903  | 0.156895128 | 0.0096525 |
| MED12L               | 0.122449   | 0.080163599 | 0.0017406 |
| CARD16,CASP1,CASP1P2 | 0.1142857  | 0.067523584 | 0.005165  |
| RP11-274B21.1        | 0.1044776  | 0.105315948 | 0.007014  |
| RBM19                | 0.1034483  | 0.104675506 | 0.0046332 |

| Gene   | AS Peptide | HLA binder | Rank (%) |
|--------|------------|------------|----------|
| MED12L | QTMPQGYTMY | HLA-A26:01 | 0.1164   |
| MED12L | QTMPQGYTM  | HLA-B35:01 | 0.2933   |
| MED12L | QTRPFQQTM  | HLA-C12:03 | 0.1609   |
| MROH2A | IAACNLAAL  | HLA-B35:01 | 2.1569   |
| MROH2A | IAACNLAAL  | HLA-C12:03 | 0.3414   |

Peptide with predicted significant binding is highlighted

Supplementary Table 8 - Predicted binding of MYB-NFIB / NFIB-MYB / MYBL1-NFIB fusion-derived peptides in ACC tumors. INTEGRATE-Neo results combining HLAMiner results (HLA typing from RNA-seq data) and identified fusion peptides for binding affinity prediction (NetMHC 4.0) (Column E). During preparation of the manuscript, NetMHCpan 4.0 was released and a comparison of the predicted binding is shown (Column F). In addition, since some HLA sequences are highly homologous, NetMHCpan 4.0-predicted peptide affinities to HLA-A\*02:01 are also shown (Column G). A list of unique peptides is provided (right).

| Patient | Fusion      | Peptide sequence | HLA        | HLA Affinity (nM) - NetMHC4 | NetMHCpan 4 (% Rank) | NetMHCpan 4 for HLA-A0201 (% Rank) |
|---------|-------------|------------------|------------|-----------------------------|----------------------|------------------------------------|
| ACC_M1  | NFIB>>MYB   | MMYSPICLTQT      | HLA-A02:03 | 414.87                      | 3.7205               | 5.3193                             |
| ACC_M1  | MYB>>NFIB   | QQVLPSWYL        | HLA-A02:02 | 252.74                      | 1.8534               | 1.9713                             |
| ACC_M1  | MYB>>NFIB   | QQVLPSWYL        | HLA-A02:06 | 11.91                       | 1.8534               | 0.4054                             |
| ACC_M1  | MYB>>NFIB   | ELKGGQSWYL       | HLA-A02:02 | 440.89                      | 6.7919               | 11.4535                            |
| ACC_M1  | NFIB>>MYB   | YSPICLTQFL       | HLA-A02:02 | 419.26                      | 17.3021              | 24.7792                            |
| ACC_M1  | MYB>>NFIB   | QQLRICDWTM       | HLA-A02:06 | 260.1                       | 6.4577               | 14.2117                            |
| ACC_M9  | MYB>>NFIB   | TLQFIDSLRI       | HLA-A02:02 | 264.35                      | 2.6228               | 2.2614                             |
| ACC_M9  | MYB>>NFIB   | LQFIDSLRI        | HLA-A02:06 | 170.89                      | 1.1201               | 2.9587                             |
| ACC_M9  | MYB>>NFIB   | SLRICDWTM        | HLA-A02:16 | 115.26                      | 5.6458               | 5.0656                             |
| ACC_M9  | MYB>>NFIB   | LQFIDSSWYL       | HLA-A02:01 | 17.62                       | 1.4432               | 1.4432                             |
| ACC_M9  | MYB>>NFIB   | LQFIDSSWYL       | HLA-A02:02 | 16.08                       | 1.6007               | 1.4432                             |
| ACC_M9  | MYB>>NFIB   | LQFIDSSWYL       | HLA-A02:03 | 180.74                      | 4.0551               | 1.4432                             |
| ACC_M9  | MYB>>NFIB   | LQFIDSSWYL       | HLA-A02:06 | 5.07                        | 0.5295               | 1.4432                             |
| ACC_M9  | MYB>>NFIB   | FIDSSWYL         | HLA-A02:11 | 188.14                      | 1.0686               | 1.0378                             |
| ACC_M9  | MYB>>NFIB   | FIDSSWYL         | HLA-A02:12 | 43.41                       | 1.0009               | 1.0378                             |
| ACC_M9  | MYB>>NFIB   | FIDSSWYL         | HLA-A02:16 | 32.27                       | 1.2373               | 1.0378                             |
| ACC_M9  | MYB>>NFIB   | QFIDSSWYL        | HLA-A02:17 | 192.27                      | 0.2664               | 1.3362                             |
| ACC_M9  | NFIB>>MYB   | FLHQQQFL         | HLA-A02:02 | 286.14                      | 1.7123               | 2.4742                             |
| ACC_M9  | NFIB>>MYB   | FLHQQQFLNT       | HLA-A02:03 | 389.32                      | 4.4795               | 5.4084                             |
| ACC_M9  | MYB>>NFIB   | SLPFPSPQL        | HLA-A02:02 | 72.74                       | 0.6031               | 1.4913                             |
| ACC_M9  | MYB>>NFIB   | SLPFPSPQL        | HLA-A02:03 | 27.08                       | 0.6352               | 1.4913                             |
| ACC_M9  | MYB>>NFIB   | SQLRICDWTM       | HLA-A02:06 | 159.29                      | 4.3985               | 8.3925                             |
| ACC_M9  | MYB>>NFIB   | SLPFPSPQL        | HLA-A02:11 | 381.8                       | 0.8647               | 1.4913                             |
| ACC_P11 | MYB>>NFIB   | SLASPLQLRI       | HLA-A02:01 | 421.08                      | 0.894                | 0.894                              |
| ACC_P11 | MYB>>NFIB   | SLASPLQLRI       | HLA-A02:02 | 17.15                       | 0.5527               | 0.894                              |
| ACC_P11 | MYB>>NFIB   | SLASPLQLRI       | HLA-A02:03 | 28.72                       | 0.3469               | 0.894                              |
| ACC_P11 | MYB>>NFIB   | LQLRICDWTM       | HLA-A02:06 | 103.75                      | 9.0628               | 14.3081                            |
| ACC_P11 | MYB>>NFIB   | SLASPLQSWYL      | HLA-A02:01 | 96.81                       | 0.9213               | 0.9213                             |
| ACC_P11 | MYB>>NFIB   | SLASPLQSWYL      | HLA-A02:02 | 17.99                       | 0.6348               | 0.9213                             |
| ACC_P11 | MYB>>NFIB   | LASPLQSWYL       | HLA-A02:06 | 227.85                      | 10.8546              | 14.1418                            |
| ACC_P11 | MYB>>NFIB   | PLQSWYLG         | HLA-A02:11 | 264.27                      | 83.5714              | 80                                 |
| ACC_P11 | MYB>>NFIB   | SLASPLQPT        | HLA-A02:01 | 358.35                      | 1.4285               | 1.4285                             |
| ACC_P11 | MYB>>NFIB   | SLASPLQPT        | HLA-A02:02 | 102.89                      | 1.1757               | 1.4285                             |
| ACC_P11 | MYB>>NFIB   | SLASPLQPT        | HLA-A02:03 | 20.61                       | 0.604                | 1.4285                             |
| ACC_P11 | MYB>>NFIB   | SLASPLQPT        | HLA-A02:06 | 149.34                      | 1.5454               | 1.4285                             |
| ACC_P11 | MYB>>NFIB   | SLASPLQPT        | HLA-A02:11 | 21.46                       | 0.8618               | 1.4285                             |
| ACC_P11 | MYB>>NFIB   | FLQPTQQA         | HLA-A02:16 | 171.36                      | 8.4943               | 6.0986                             |
| ACC_P13 | MYBL1>>NFIB | MQLRICDWTM       | HLA-A02:06 | 45.44                       | 5.866                | 10.7078                            |
| ACC_P13 | MYBL1>>NFIB | ISDMQSWYL        | HLA-A02:06 | 319.32                      | 2.1031               | 3.4677                             |
| ACC_P13 | MYBL1>>NFIB | DMQSWYLG         | HLA-A02:11 | 196.4                       | 76.6667              | 78                                 |
| ACC_P13 | MYBL1>>NFIB | IVLRICDWTM       | HLA-A02:06 | 424.18                      | 11.5055              | 12.5907                            |
| ACC_P13 | MYBL1>>NFIB | VLRICDWTM        | HLA-A02:11 | 364.85                      | 6.5228               | 6.1286                             |
| ACC_P13 | MYBL1>>NFIB | VLRICDWTM        | HLA-A02:16 | 264.36                      | 7.1899               | 6.1286                             |
| ACC_P14 | MYB>>NFIB   | SLASPLQSWYL      | HLA-A02:02 | 17.99                       | 0.6348               | 0.9213                             |
| ACC_P14 | MYB>>NFIB   | LASPLQSWYL       | HLA-A02:06 | 227.85                      | 10.8546              | 14.1418                            |
| ACC_P14 | MYB>>NFIB   | PLQSWYLG         | HLA-A02:11 | 264.27                      | 83.5714              | 80                                 |
| ACC_P15 | MYBL1>>NFIB | SLRICDWTM        | HLA-A02:16 | 115.26                      | 5.6458               | 5.0656                             |
| ACC_P15 | MYBL1>>NFIB | KRIFSSWYL        | HLA-A02:06 | 254.21                      | 1.0669               | 2.4367                             |
| ACC_M18 | MYB>>NFIB   | SLASPLQLRI       | HLA-A02:01 | 421.08                      | 0.894                | 0.894                              |
| ACC_M18 | MYB>>NFIB   | LQLRICDWTM       | HLA-A02:06 | 103.75                      | 9.0628               | 14.3081                            |

Unique MYB-NFIB / NFIB-MYB / MYBL1-NFIB peptides predicted to bind HLA-A\*02

| Sequence    | Fusion                |
|-------------|-----------------------|
| QQVLPSWYL   | MYB-NFIB              |
| ELKGGQSWYL  | MYB-NFIB              |
| QQLRICDWTM  | MYB-NFIB              |
| TLQFIDSLRI  | MYB-NFIB              |
| LQFIDSLRI   | MYB-NFIB              |
| LQFIDSSWYL  | MYB-NFIB              |
| FIDSSWYL    | MYB-NFIB              |
| QFIDSSWYL   | MYB-NFIB              |
| SLPFPSPQL   | MYB-NFIB              |
| SQLRICDWTM  | MYB-NFIB              |
| SLASPLQLRI  | MYB-NFIB              |
| LQLRICDWTM  | MYB-NFIB              |
| SLASPLQSWYL | MYB-NFIB              |
| LASPLQSWYL  | MYB-NFIB              |
| PLQSWYLG    | MYB-NFIB              |
| SLASPLQPT   | MYB-NFIB              |
| PLQPTQQA    | MYB-NFIB              |
| ETLQFIDSLR  | MYB-NFIB              |
| AETLQFIDSL  | MYB-NFIB              |
| LQFIDSSWY   | MYB-NFIB              |
| AETLQFIDSSW | MYB-NFIB              |
| SLPFPSPQLR  | MYB-NFIB              |
| LFPFPSPQL   | MYB-NFIB              |
| AETLQFIDSS  | MYB-NFIB              |
| SLRICDWTM   | MYB-NFIB / MYBL1-NFIB |
| MQLRICDWTM  | MYBL1-NFIB            |
| ISDMQSWYL   | MYBL1-NFIB            |
| DMQSWYLG    | MYBL1-NFIB            |
| IVLRICDWTM  | MYBL1-NFIB            |
| VLRICDWTM   | MYBL1-NFIB            |
| KRIFSSWYL   | MYBL1-NFIB            |
| MMYSPICLTQT | NFIB-MYB              |
| YSPICLTQFL  | NFIB-MYB              |
| FLHQQQFL    | NFIB-MYB              |
| FLHQQQFLNT  | NFIB-MYB              |
| ASPTATILK   | NFIB-MYB              |
| EAASPTATILK | NFIB-MYB              |
| GEAASPTATI  | NFIB-MYB              |
| EAASPTATI   | NFIB-MYB              |
| SPQTSQFL    | NFIB-MYB              |
| SSPQTSQFL   | NFIB-MYB              |

HLA-A\*02:01 peptides are highlighted

Peptide in which Patient ACC\_M9 autologous T cells have reactivity towards

Supplementary Table 9 - Primer sequences for cloning MYB-NFIB / NFIB-MYB fusions. The cloning strategy is shown with the appropriate primer pairs.

| Primer name              | Sequence                                                                           | Comments                                      | Template                                   |
|--------------------------|------------------------------------------------------------------------------------|-----------------------------------------------|--------------------------------------------|
| <b>MYB-N-term</b>        |                                                                                    |                                               |                                            |
| MYB-1F                   | CACACA-CGTCTC-GAATTC-ATGGCCCCGAAGACCCCGGCACAG                                      | PCR with MYB-1F + MYB-6R, digest with BsmBI   | ACC_M9 cDNA (from fresh frozen tumor RNA)  |
| MYB-6R                   | CACACA-CGTCTC-GGATCC-AGAATCTATAAATTGGAGTGT                                         |                                               |                                            |
| <b>MYB-NFIB Fusion 1</b> |                                                                                    |                                               |                                            |
| MYB-1F                   | CACACA-CGTCTC-GAATTC-ATGGCCCCGAAGACCCCGGCACAG                                      | PCR with MYB-1F + MYB-3R, digest with BsmBI   | ACC_M9 cDNA (from fresh frozen tumor RNA)  |
| MYB-3R                   | TGTGTG-CGTCTCA-AGAATCTATAAATTGGAGTGT                                               |                                               |                                            |
| NFIB-4F                  | CACACA-CGTCTCA-TTCTCTGAGGATTTGTGACTGG                                              | PCR with NFIB-4F + NFIB-2R, digest with BamHI | ACC_M9 cDNA (from fresh frozen tumor RNA)  |
| NFIB-2R                  | TGTGTG-GGATCC-GTTGCTTGTTCGTCTGAAGG                                                 |                                               |                                            |
| <b>MYB-NFIB Fusion 2</b> |                                                                                    |                                               |                                            |
| MYB-1F                   | CACACA-CGTCTC-GAATTC-ATGGCCCCGAAGACCCCGGCACAG                                      | PCR with MYB-1F + MYB-8R, digest with BsmBI   | ACC_M9 cDNA (from fresh frozen tumor RNA)  |
| MYB-8R                   | CACACA-CGTCTC-GGATCC-GCCCAGGTACCAGGA-AGAATCTATAAATTGGAGTGT                         |                                               |                                            |
| <b>MYB-NFIB Fusion 3</b> |                                                                                    |                                               |                                            |
| MYB-1F                   | CACACA-CGTCTC-GAATTC-ATGGCCCCGAAGACCCCGGCACAG                                      | PCR with MYB-1F + MYB-2R, digest with BsmBI   | ACC_M9 cDNA (from fresh frozen tumor RNA)  |
| MYB-2R                   | TGTGTG-CGTCTCA-TCAG-CTGCGAGGGAGAGAAGGGTAG                                          |                                               |                                            |
| NFIB-3F                  | CACACA-CGTCTCA-CTGAGGATTTGTGACTGGACC                                               | PCR with NFIB-3F + NFIB-2R, digest with BamHI | ACC_M9 cDNA (from fresh frozen tumor RNA)  |
| NFIB-2R                  | TGTGTG-GGATCC-GTTGCTTGTTCGTCTGAAGG                                                 |                                               |                                            |
| <b>NFIB-MYB Fusion 7</b> |                                                                                    |                                               |                                            |
| NFIB-6F                  | CACACA-CGTCTC-GAATTC-ATGATGTATTCTCCCATCTGTCTCACTCAG-ACACAGAACCACACATGCAGCTAC       | PCR with NFIB-6F + MYB-1R, digest with BsmBI  | ACC_M12 cDNA (from fresh frozen tumor RNA) |
| MYB-1R                   | TGTGTG-CGTCTC-GGATCC-CATGACCAGCGTCCGGGCTGAGA                                       |                                               |                                            |
| <b>MYB-NFIB Fusion 8</b> |                                                                                    |                                               |                                            |
| MYB-1F                   | CACACA-CGTCTC-GAATTC-ATGGCCCCGAAGACCCCGGCACAG                                      | PCR with MYB-1F + NFIB-6R, digest with BsmBI  | ACC_M12 cDNA (from fresh frozen tumor RNA) |
| NFIB-6R                  | CACACA-CGTCTC-GGATCC-GCCCAGGTACCAGGACTGCAAGGGGCTCGC                                |                                               |                                            |
| <b>MYB-NFIB Fusion 9</b> |                                                                                    |                                               |                                            |
| MYB-1F                   | CACACA-CGTCTC-GAATTC-ATGGCCCCGAAGACCCCGGCACAG                                      | PCR with MYB-1F + NFIB-7R, digest with BsmBI  | ACC_M12 cDNA (from fresh frozen tumor RNA) |
| NFIB-7R                  | CACACA-CGTCTC-GGATCC-GTCCACATATCGATTGGCTTGAGATGTGCCCTGAGGCTGTGTAGG-CTGCAAGGGGCTCGC |                                               |                                            |
